# Supplementary material
Source: PubMed Central journal article supplement (PMC8630983)
Supplement: NIHMS1751037-supplement-1.pdf [file NIHMS1751037-supplement-1.pdf]

429 **Supplemental Table 1: Procedure Costs Based on 2019 National Average**  
 430 **Medicare Reimbursement Fee Schedule**

| Parameter                                                                | CPT or HCPCS Code | Cost per eye per visit |
|--------------------------------------------------------------------------|-------------------|------------------------|
| Aflibercept                                                              | J0178             | \$1,850.00             |
| Bevacizumab                                                              | J9035             | \$63.72                |
| Cataract extraction with IOL placement                                   | 66984             | \$ 3,242.20*           |
| Ciliary body destruction by transscleral cyclophotocoagulation           | 66710             | \$2,215.24             |
| Established patient, intermediate examination                            | 92012             | \$89.74                |
| Intravitreal injection procedure                                         | 67028             | \$104.15               |
| Laser retinopexy                                                         | 67145             | \$541.31               |
| Macular laser photocoagulation                                           | 67210             | \$530.50               |
| Optical coherence tomography (OCT) of macula                             | 92134             | \$41.81                |
| Panretinal (scatter) photocoagulation                                    | 67228             | \$350.66               |
| Paracentesis of anterior chamber                                         | 65800             | \$123.25               |
| Repair of retinal detachment with scleral buckle                         | 67107             | \$5,869.46             |
| Repair of retinal detachment with vitrectomy                             | 67108             | \$5,938.30             |
| Retinal detachment repair with gas injection (e.g. pneumatic retinopexy) | 67110             | \$2,750.38             |
| Vitrectomy                                                               | 67036             | \$5,632.33             |
| Vitrectomy with focal endolaser photocoagulation                         | 67039             | \$5,697.92             |
| Vitrectomy with removal of preretinal cellular membrane                  | 67041             | \$5,889.64             |
| YAG capsulotomy                                                          | 66821             | \$339.49               |

431 CPT, Current Procedural Terminology Codes; HCPCS, Healthcare Common Procedure  
 432 Coding System; IOL, intraocular lens

433 \*Including proposed cut to physician reimbursement in 2020 to Work RVU of 7.35

434

435

436

437  
438

**Supplemental Table 2: Additional Assumptions for Population Long-term Modeling**

| Epidemiology                                     |              |                                                                                                                                                                                                                                                                                                                                                                      |
|--------------------------------------------------|--------------|----------------------------------------------------------------------------------------------------------------------------------------------------------------------------------------------------------------------------------------------------------------------------------------------------------------------------------------------------------------------|
|                                                  | Assumptions  | Notes                                                                                                                                                                                                                                                                                                                                                                |
| Starting Diagnosed Diabetes Prevalence           |              | CDC national diabetes statistics report estimates 26.7 million adults with diagnosed diabetes in 2018. Incidence (see next row) for two years is added to estimate 2020 prevalence. <sup>8</sup><br>This total is consistent with the ADA reporting 23 million diagnosed in 2015 <sup>13</sup> but Boyle et al 2010 <sup>14</sup> projected about 35 million in 2020 |
| White, Non-Hispanic                              | 15.4 million | CDC national diabetes statistics report estimates                                                                                                                                                                                                                                                                                                                    |
| Black, Non-Hispanic                              | 4.2 million  | CDC national diabetes statistics report estimates                                                                                                                                                                                                                                                                                                                    |
| Asian, Non-Hispanic                              | 1.6 million  | CDC national diabetes statistics report estimates                                                                                                                                                                                                                                                                                                                    |
| Hispanic                                         | 4.9 million  | CDC national diabetes statistics report estimates                                                                                                                                                                                                                                                                                                                    |
| Annual Incidence of Diagnosed Diabetes           |              | CDC national diabetes statistics report estimates                                                                                                                                                                                                                                                                                                                    |
| White, Non-Hispanic                              | 786 thousand | CDC national diabetes statistics report estimates                                                                                                                                                                                                                                                                                                                    |
| Black, Non-Hispanic                              | 213 thousand | CDC national diabetes statistics report estimates                                                                                                                                                                                                                                                                                                                    |
| Asian, Non-Hispanic                              | 97 thousand  | CDC national diabetes statistics report estimates                                                                                                                                                                                                                                                                                                                    |
| Hispanic                                         | 334 thousand | CDC national diabetes statistics report estimates                                                                                                                                                                                                                                                                                                                    |
| Existing Prevalence of DME in diagnosed diabetes |              | Varma, 2014 <sup>9</sup>                                                                                                                                                                                                                                                                                                                                             |
| White, Non-Hispanic                              | 2.6          | Varma, 2014                                                                                                                                                                                                                                                                                                                                                          |
| Black, Non-Hispanic                              | 8.4          | Varma, 2014                                                                                                                                                                                                                                                                                                                                                          |
| Asian, Non-Hispanic                              | 2.6          | Assumed to be same as White. Varma, 2014                                                                                                                                                                                                                                                                                                                             |
| Hispanic                                         | 5.1          | Varma, 2014                                                                                                                                                                                                                                                                                                                                                          |
| Proportion of DME that is center-involved        | 0.704        | ETDRS                                                                                                                                                                                                                                                                                                                                                                |
| Proportion of CI DME with 20/32 or worse         | 0.602        | ETDRS                                                                                                                                                                                                                                                                                                                                                                |
| Annual incidence of DME                          |              |                                                                                                                                                                                                                                                                                                                                                                      |

|                                                                        |              |                                                                                                                     |           |                          |
|------------------------------------------------------------------------|--------------|---------------------------------------------------------------------------------------------------------------------|-----------|--------------------------|
| White, Non-Hispanic <sup>15</sup>                                      | 1.19%        | Converted from 4-year incidence, Klein, 1989 <sup>15</sup>                                                          |           |                          |
| Black, Non-Hispanic                                                    | 1.14%        | Converted from 4-year incidence, Leske 2003 <sup>16</sup>                                                           |           |                          |
| Asian, Non-Hispanic                                                    | 1.19%        | Assumed to be same as White.                                                                                        |           |                          |
| Hispanic                                                               | 1.61%        | Converted from 4-year incidence, Varma, 2010 <sup>17</sup>                                                          |           |                          |
| Proportion of incident CI DME with 20/32 or worse                      | 0.602        | ETDRS, VARMA 2010 <sup>17</sup>                                                                                     |           |                          |
| <b>Model initialization of treatment</b>                               |              |                                                                                                                     |           |                          |
| Of those treated at time 0, fraction starting in year 1                | 0.33         |                                                                                                                     |           |                          |
| Of those treated at time 0 and not in year 1, those in year 2 (vs. 3+) | 0.50         |                                                                                                                     |           |                          |
| US Mortality                                                           | 0.008447     | From 2017 Life Tables (Arias, 2017 <sup>18</sup> ) at age 59 (mean age at enrollment from Protocol V <sup>1</sup> ) |           |                          |
| Diabetes vs. Nondiabetes Relative Mortality                            | 2.31         | Gregg, 2007 <sup>19</sup>                                                                                           |           |                          |
| <b>Mean Number of injections by treatment group</b>                    |              |                                                                                                                     |           |                          |
|                                                                        | <b>Years</b> |                                                                                                                     |           |                          |
| <b>Treatment Group</b>                                                 | <b>1</b>     | <b>2</b>                                                                                                            | <b>≥3</b> |                          |
| Aflibercept                                                            | 5.81         | 2.23                                                                                                                | 0.5       | From Protocol V analysis |
| Laser                                                                  | 0.70         | 1.21                                                                                                                | 0.5       | From Protocol V Analysis |
| Observation                                                            | 1.32         | 1.50                                                                                                                | 0.5       | From Protocol V Analysis |
| <b>Cost per unit</b>                                                   | \$1954       |                                                                                                                     |           | Medicare                 |
| <b>Mean Number of laser treatments by treatment groups</b>             |              |                                                                                                                     |           |                          |
|                                                                        | <b>Years</b> |                                                                                                                     |           |                          |
| <b>Treatment Group</b>                                                 | <b>1</b>     | <b>2</b>                                                                                                            |           |                          |
| Aflibercept                                                            | 0.04         | 0.04                                                                                                                |           | From Protocol V Analysis |
| Laser                                                                  | 1.30         | 0.19                                                                                                                |           | From Protocol V Analysis |
| Observation                                                            | 0.01         | 0.03                                                                                                                |           | From Protocol V Analysis |
| <b>Cost per unit</b>                                                   | \$ 530       |                                                                                                                     |           | See Supplemental Table 1 |
| <b>Visits without treatment (injections or lasers)</b>                 |              |                                                                                                                     |           |                          |
|                                                                        | <b>Years</b> |                                                                                                                     |           |                          |
| <b>Treatment Group</b>                                                 | <b>1</b>     | <b>2</b>                                                                                                            | <b>≥3</b> |                          |
| Aflibercept                                                            | 4.21         | 4.70                                                                                                                | 3         | From Protocol V Analysis |
| Laser                                                                  | 3.80         | 4.52                                                                                                                | 3         | From Protocol V Analysis |

|                           |              |          |   |                          |
|---------------------------|--------------|----------|---|--------------------------|
| Observation               | 5.06         | 4.63     | 3 | From Protocol V Analysis |
| <b>Cost per unit</b>      | \$ 132       |          |   | See Supplemental Table 1 |
| <b>Other annual costs</b> |              |          |   |                          |
|                           | <b>Years</b> |          |   |                          |
| <b>Treatment Group</b>    | <b>1</b>     | <b>2</b> |   |                          |
| Aflibercept               | \$ 110       | \$ 97    |   | From Protocol V Analysis |
| Laser                     | \$ 147       | \$ 76    |   | From Protocol V Analysis |
| Observation               | \$ 27        | \$ 77    |   | From Protocol V Analysis |

439

440

441 **Supplemental Table 3a: U.S. Population Costs assuming lower diabetes**  
 442 **prevalence and incidence**

|                          | Total Annual Costs (billions) |                 |                 | Differences (billions) |                |                 |
|--------------------------|-------------------------------|-----------------|-----------------|------------------------|----------------|-----------------|
|                          | Aflibercept                   | Laser           | Observation     | A-L                    | O-L            | A-O             |
| 2020                     | \$1.76 billion                | \$0.69 billion  | \$0.79 billion  | \$1.07 billion         | \$0.10 billion | \$0.97 billion  |
| 2021                     | \$1.82 billion                | \$0.79 billion  | \$0.89 billion  | \$1.02 billion         | \$0.09 billion | \$0.93 billion  |
| 2022                     | \$1.94 billion                | \$0.91 billion  | \$1.00 billion  | \$1.03 billion         | \$0.09 billion | \$0.94 billion  |
| 2023                     | \$2.09 billion                | \$1.03 billion  | \$1.13 billion  | \$1.06 billion         | \$0.10 billion | \$0.96 billion  |
| 2024                     | \$2.23 billion                | \$1.15 billion  | \$1.25 billion  | \$1.08 billion         | \$0.10 billion | \$0.98 billion  |
| 2025                     | \$2.38 billion                | \$1.28 billion  | \$1.38 billion  | \$1.10 billion         | \$0.10 billion | \$1.00 billion  |
| 2026                     | \$2.53 billion                | \$1.40 billion  | \$1.50 billion  | \$1.12 billion         | \$0.10 billion | \$1.02 billion  |
| 2027                     | \$2.67 billion                | \$1.53 billion  | \$1.63 billion  | \$1.15 billion         | \$0.10 billion | \$1.04 billion  |
| 2028                     | \$2.82 billion                | \$1.65 billion  | \$1.76 billion  | \$1.17 billion         | \$0.11 billion | \$1.06 billion  |
| 2029                     | \$2.96 billion                | \$1.78 billion  | \$1.88 billion  | \$1.19 billion         | \$0.11 billion | \$1.08 billion  |
| Cumulative Undiscounted* | \$23.20 billion               | \$12.21 billion | \$13.21 billion | \$10.99 billion        | \$0.99 billion | \$10.00 billion |
| Cumulative Discounted**  | \$20.09 billion               | \$10.47 billion | \$11.34 billion | \$9.62 billion         | \$0.87 billion | \$8.75 billion  |

443 A: Aflibercept; L: Laser; O: Observation

444 These estimates are based on the same assumptions underlying the main results  
 445 (Table 2 of the main text) except they are based on the lower end of the 95%  
 446 confidence intervals on diabetes incidence (Table 2 of the 2020 CDC National Diabetes  
 447 Statistics Report) and diabetes prevalence (Table 1b of the 2020 CDC National  
 448 Diabetes Statistics Report).

449 \*Sum of the costs from 2020 through 2029.

450 \*\*Discounts cost from 2021 through 2029 by 3% for each year in the future and then  
 451 sums them together.

452

453

454

455 **Supplemental Table 3b: U.S. Population Costs assuming higher diabetes**  
 456 **prevalence and incidence**

|                          | Total Annual Costs (billions) |                 |                 | Differences (billions) |                |                 |
|--------------------------|-------------------------------|-----------------|-----------------|------------------------|----------------|-----------------|
|                          | Aflibercept                   | Laser           | Observation     | A-L                    | O-L            | A-O             |
| 2020                     | \$2.32 billion                | \$0.91 billion  | \$1.04 billion  | \$1.41 billion         | \$0.13 billion | \$1.28 billion  |
| 2021                     | \$2.39 billion                | \$1.05 billion  | \$1.17 billion  | \$1.35 billion         | \$0.12 billion | \$1.22 billion  |
| 2022                     | \$2.57 billion                | \$1.20 billion  | \$1.32 billion  | \$1.37 billion         | \$0.12 billion | \$1.25 billion  |
| 2023                     | \$2.79 billion                | \$1.37 billion  | \$1.50 billion  | \$1.42 billion         | \$0.13 billion | \$1.29 billion  |
| 2024                     | \$3.01 billion                | \$1.54 billion  | \$1.67 billion  | \$1.47 billion         | \$0.13 billion | \$1.34 billion  |
| 2025                     | \$3.23 billion                | \$1.72 billion  | \$1.85 billion  | \$1.51 billion         | \$0.14 billion | \$1.38 billion  |
| 2026                     | \$3.45 billion                | \$1.89 billion  | \$2.03 billion  | \$1.56 billion         | \$0.14 billion | \$1.42 billion  |
| 2027                     | \$3.67 billion                | \$2.07 billion  | \$2.22 billion  | \$1.60 billion         | \$0.14 billion | \$1.46 billion  |
| 2028                     | \$3.90 billion                | \$2.25 billion  | \$2.40 billion  | \$1.64 billion         | \$0.15 billion | \$1.50 billion  |
| 2029                     | \$4.12 billion                | \$2.44 billion  | \$2.59 billion  | \$1.69 billion         | \$0.15 billion | \$1.53 billion  |
| Cumulative Undiscounted* | \$31.45 billion               | \$16.44 billion | \$17.79 billion | \$15.02 billion        | \$1.36 billion | \$13.66 billion |
| Cumulative Discounted**  | \$27.19 billion               | \$14.07 billion | \$15.26 billion | \$13.11 billion        | \$1.18 billion | \$11.93 billion |

457 A: Aflibercept; L: Laser; O: Observation

458 These estimates are based on the same assumptions underlying the main results  
 459 (Table 2 of the main text) except they are based on the upper end of the 95%  
 460 confidence intervals on diabetes incidence (Table 2 of the 2020 CDC National Diabetes  
 461 Statistics Report) and diabetes prevalence (Table 1b of the 2020 CDC National  
 462 Diabetes Statistics Report).

463

464 \*Sum of the costs from 2020 through 2029.

465 \*\*Discounts cost from 2021 through 2029 by 3% for each year in the future and then  
 466 sums them together.

467

468

469 **Supplemental Figure 1: Forecast of cases of prevalent and diagnosed diabetes**  
470 **from 2020-2030 (A); cases of with CI-DME and CI-DME with VA of 20/25 or better**  
471 **(B)**

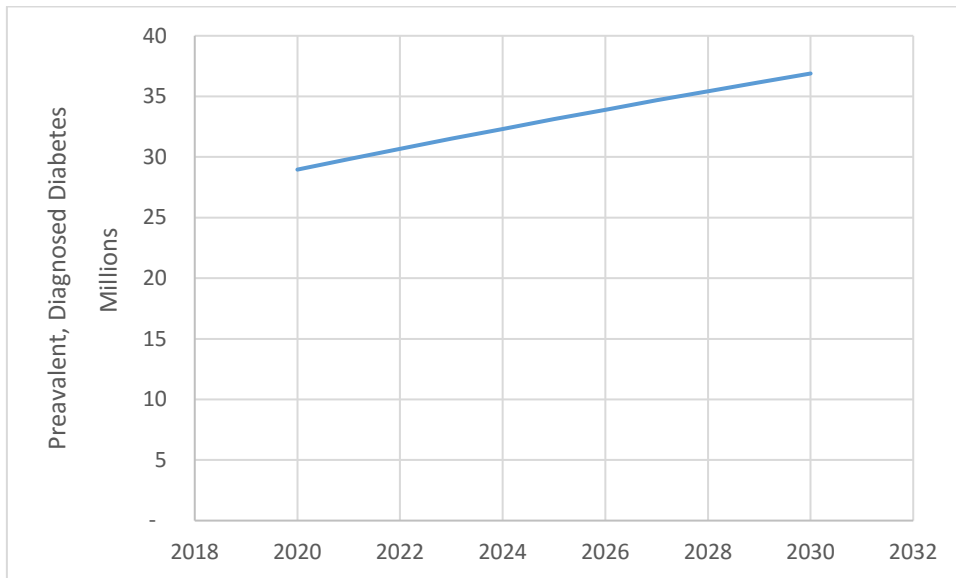

472

473

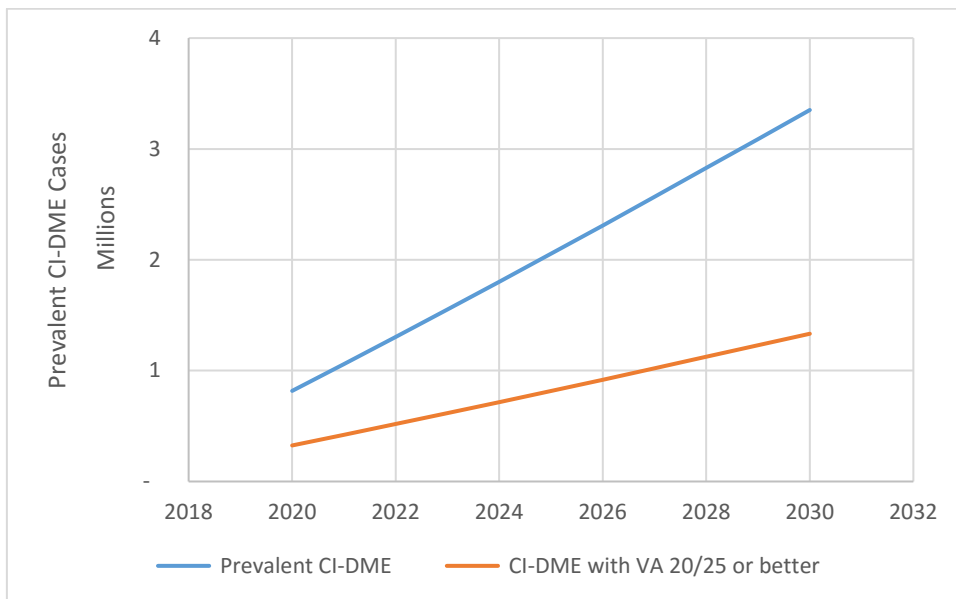

474

475

476 CI-DME, Center-involved diabetic macular edema; VA, visual acuity  
477 Panel A: A relatively simple model of diabetes prevalence in the United States was used to simulate  
478 prevalent, diagnosed diabetes; starting with a diagnosed diabetes prevalence of 28.96 million adults in  
479 2020. The prevalence increases with annual incidence of 1.43 million cases, but drops with mortality  
480 based on annual US mortality of 0.84% (mortality at age 59,<sup>18</sup> which was the average age from protocol  
481 V)<sup>20</sup> multiplied by a relative risk of mortality in diabetics of 2.31 for an overall annual mortality of 1.94%.

482 Panel B uses the prevalence of diabetes and adds incidence of CI-DME, a proportion of which has VA  
483 20/25 or better.

484



485 **Supplemental Figure 2: Sensitivity on numbers of annual aflibercept injections in**  
486 **years 3+**

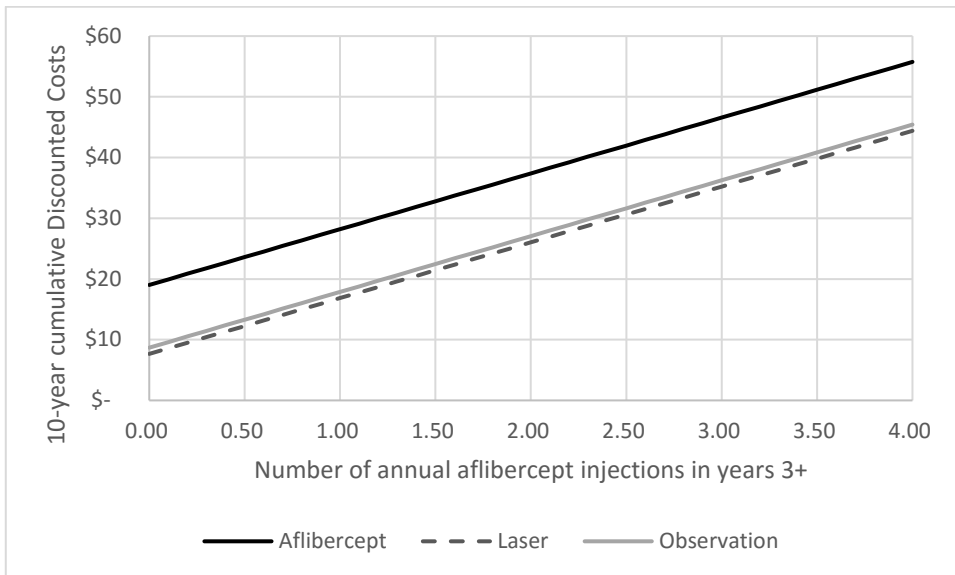

487

488 The base case assumption was 0.5 injections per year in each group.

489

490 **Supplemental Figure 3: Sensitivity on numbers of annual visits in years 3+**

491

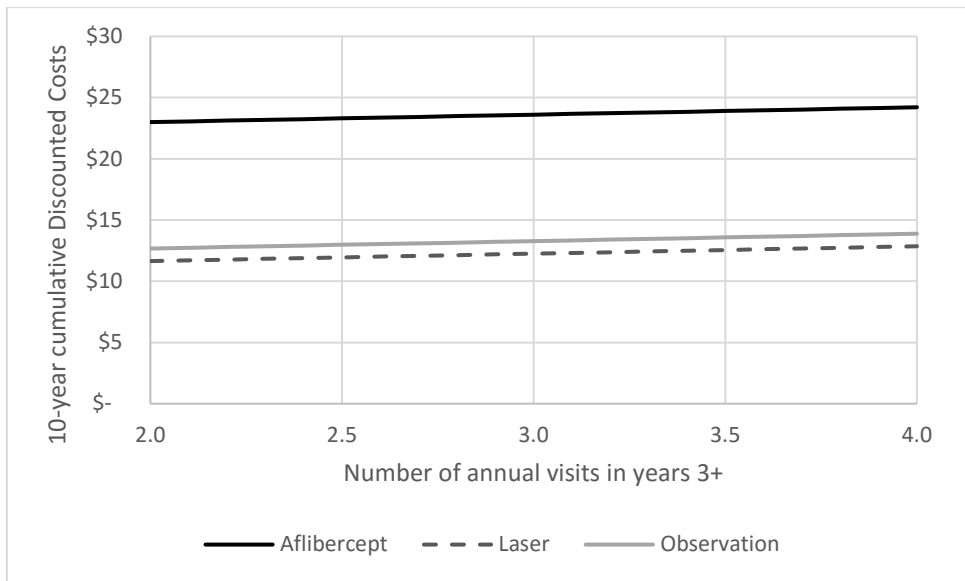

492

493 The base case assumption was 3 visits per year in each group.

494

495
